# Supplementary material
Source: publisher figshare collection journal article supplement (https://acs.figshare.com/ndownloader/files/4601629)
Supplement: Supplementary file 1 [file 4601629]

Figure caption for Supplementary figure S1.

Electrospray Mass Spectrometry of DR1199 protein performed when samples were treated with DTT (panel A) and H<sub>2</sub>O<sub>2</sub> (panel B). Experimental conditions were as described in the main text.
